# Supplementary material for: Children Use Wealth Cues to Evaluate Others
Source: PLoS One. 2016 Mar 2;11(3):e0149360. doi: 10.1371/journal.pone.0149360 (PMC4774995; doi:10.1371/journal.pone.0149360)
Supplement: S2 Data — (XLSX) [file pone.0149360.s002.xlsx]

## Sheet: Variable Keys
SubNum	Subject Number
Outfits	Score on outfits trial
Artifacts	Score on artifacts trial
Belongings	Score on belongings trial
Preference	Score on preference trials
Competence	Score on competence trials
Popularity	Score on popularity trials

## Sheet: Data
SubNum	Outfits	Artifacts	Belongings	Preference	Competence	Popularity
1	0	1	1	1	1	1
2	1	0	1	1	0	2
3	0	1	1	0	0	1
4	1	1	1	2	0	2
5	1	0	1	2	1	1
6	1	1	0	2	0	1
7	1	1	0	2	1	2
8	1	0	1	1	1	1
9	1	0	1	1	0	0
10	1	1	1	1	1	1
11	1	0	1	1	2	2
12	1	1	0	0	1	1
13	1	0	0	2	1	1
14	1	1	1	2	2	2
15	0	1	1	0	1	1
16	1	1	0	2	0	2
17	0	0	0	1	2	2
18	0	0	1	2	2	0
19	1	1	0	0	1	0
20	1	1	1	1	2	2
21	1	1	0	2	2	1
22	1	1	0	1	1	0
23	1	0	0	2	1	2
24	1	1	1	2	2	2
25	1	1	0	2	2	2
26	1	0	1	0	1	1
27	1	0	1	1	2	1
28	1	0	1	2	0	1
29	1	1	0	2	1	2
30	0	1	1	1	0	0
31	1	1	0	2	2	1
32	1	1	1	0	2	2
33	1	0	0	2	2	1
34	1	1	1	1	1	1
35	0	1	0	2	2	1
36	1	1	1	2	1	2
37	1	1	1	0	2	1
38	1	1	1	2	2	2
39	1	1	1	2	2	1
40	0	1	1	1	2	1
41	1	1	1	1	2	1
42	1	0	1	.	2	2
43	1	1	1	1	0	1
44	1	1	1	2	2	1
45	1	1	1	2	2	2
46	1	0	1	2	1	1
47	1	0	1	2	0	2
48	1	1	1	2	2	2
