# Supplementary material for: Children Use Wealth Cues to Evaluate Others
Source: PLoS One. 2016 Mar 2;11(3):e0149360. doi: 10.1371/journal.pone.0149360 (PMC4774995; doi:10.1371/journal.pone.0149360)
Supplement: S4 Data — (XLSX) [file pone.0149360.s004.xlsx]

## Sheet: Variable Keys
Subnum	Subject Number
Wealth	Score on wealth trials
Competence	Score on competence trials
Popularity	Score on popularity trials

## Sheet: Data
Subnum	Wealth	Competence	Popularity
1	3	4	4
2	4	4	4
3	4	3	4
4	4	4	4
5	4	4	4
6	4	4	4
7	4	4	4
8	4	4	4
9	3.5	3.5	3
10	4	4	4
11	4	4	4
12	4	4	4
13	4	4	4
14	2	4	2
15	3	4	2
16	4	4	3
17	4	4	4
18	0	4	2
19	4	4	4
20	3	4	4
21	3	4	4
22	4	4	4
23	4	3	1
24	4	4	4
25	3	4	4
26	4	4	4
27	4	4	4
28	4	4	4
29	4	4	4
30	3	4	4
31	3.5	4	4
32	3	3	4
33	4	4	4
34	4	4	2
35	4	4	4
36	4	4	4
37	4	4	4
38	4	4	4
39	2	4	0
40	3	4	4
41	4	4	4
42	3	4	4
43	4	4	4
44	3	3	4
45	3	3	4
46	3	4	3
47	4	4	4
48	4	4	4
